# Supplementary material
Source: PubMed Central journal article supplement (PMC10780484)
Supplement: ehp14191.smcontents.508.pdf [file ehp14191.smcontents.508.pdf]

**Note to readers with disabilities:** *EHP* strives to ensure that all journal content is accessible to all readers. However, some figures and Supplemental Material published in *EHP* articles may not conform to [508 standards](#) due to the complexity of the information being presented. If you need assistance accessing journal content, please contact [ehp508@niehs.nih.gov](mailto:ehp508@niehs.nih.gov). Our staff will work with you to assess and meet your accessibility needs within 3 working days.

### **Supplemental Material**

#### **Erratum: “Systematic Evidence Map for over One Hundred and Fifty Per- and Polyfluoroalkyl Substances (PFAS)”**

Laura M. Carlson, Michelle Angrish, Avanti V. Shirke, Elizabeth G. Radke, Brittany Schulz, Andrew Kraft, Richard Judson, Grace Patlewicz, Robyn Blain, Cynthia Lin, Nicole Vetter, Courtney Lemeris, Pamela Hartman, Heidi Hubbard, Xabier Arzuaga, Allen Davis, Laura V. Dishaw, Ingrid L. Druwe, Hillary Hollinger, Ryan Jones, J. Phillip Kaiser, Lucina Lizarraga, Pamela D. Noyes, Michele Taylor, Andrew J. Shapiro, Antony J. Williams, and Kristina A. Thayer

#### **Table of Contents**

**Additional File-** Excel Document
